1 **Endogenous giant viruses shape intraspecies genomic variability in the model green**  
2 **alga *Chlamydomonas reinhardtii***

3  
4 Mohammad Moniruzzaman\*<sup>1</sup> and Frank O. Aylward\*<sup>1</sup>

5  
6 1 Department of Biological Sciences, Virginia Tech, Blacksburg, VA  
7 Email address for correspondence: [monir@vt.edu](mailto:monir@vt.edu), [faylward@vt.edu](mailto:faylward@vt.edu)  
8

9 **Abstract:**

10  
11 *Chlamydomonas reinhardtii* is an important eukaryotic alga that has been studied as a model  
12 organism for decades. Despite extensive history as a model system, phylogenetic and genetic  
13 characteristics of viruses infecting this alga have remained elusive. We analyzed high-  
14 throughput genome sequence data of numerous *C. reinhardtii* isolates, and in six strains we  
15 discovered endogenous genomes of giant viruses reaching over several hundred kilobases in  
16 length. In addition, we have also discovered the entire genome of a closely related giant virus  
17 that is endogenized within the genome of *Chlamydomonas incerta*, one of the closest  
18 sequenced phylogenetic relatives of *C. reinhardtii*. Endogenous giant viruses add hundreds of  
19 new gene families to the host strains, highlighting their contribution to the pangenome dynamics  
20 and inter-strain genomic variability of *C. reinhardtii*. Our findings suggest that endogenization of  
21 giant viruses can have profound implications in shaping the population dynamics and ecology of  
22 protists in the environment.  
23

24 **Introduction:**

25  
26 Giant viruses that infect diverse eukaryotes have recently emerged as a widely distributed viral  
27 group in the biosphere (1, 2). These viruses belong to a broadly defined group that has been  
28 recently classified as the phylum *Nucleocytoviricota* (3). Although giant viruses are primarily  
29 studied as agents of mortality of diverse protists and metazoans, recent studies have  
30 demonstrated that they can drastically shape the genomes of their hosts through  
31 endogenization (4). Specifically, Giant Endogenous Viral Elements (GEVEs) that are up to  
32 several thousand kilobases long have been identified in diverse green algae (4), providing  
33 compelling evidence that endogenization of diverse giant viruses can profoundly influence host  
34 genome evolution and alter the evolutionary trajectory of host eukaryotes.  
35

36 *Chlamydomonas reinhardtii* is a widely used model photosynthetic eukaryote with history as a  
37 model organism dating back to the 1950s (5). Here, we report that endogenous giant viruses  
38 are common in field isolates of *C. reinhardtii*. Through identification of near-complete genomes  
39 of giant viruses endogenized in field isolates, we show that *C. reinhardtii* is a host of diverse  
40 giant viruses from distinct phylogenetic affiliations. Our results establish this widely-studied  
41 green alga as a model to study the mechanistic and evolutionary aspects of giant virus  
42 endogenization in diverse eukaryotic lineages, and provides the first insights on the genomic  
43 complexity and phylogenetic history of viruses infecting *C. reinhardtii* in nature.  
44

## 45 Results:

46

47 We analyzed publicly available high-throughput genome sequencing data for 33 wild strains of  
48 *C. reinhardtii*. This data was originally generated for population genomic studies of diverse *C.*  
49 *reinhardtii* strains (6–8). After assembly and annotation (see Methods for details), we identified  
50 GEVEs in six of the wild strains (Figure 1B). In five of these (CC-2936, 2937, 2938, 3268, and  
51 GB-66), the GEVEs range from 315-356 Kb in size and harbored all but one *Nucleocytoviricota*  
52 hallmark genes, indicating that near-complete genomes of endogenous giant viruses have been  
53 retained in these strains (Figure 1B, Dataset S1). In contrast, CC-3061 harbors a GEVE ~113  
54 Kb in size with 5 out of the 10 hallmark genes, indicating that part of the GEVE was lost over the  
55 course of evolution (Supplementary Methods, Dataset S1). We also analyzed the assembled  
56 genome of *Chlamydomonas incerta*, a species phylogenetically closest to *C. reinhardtii*, for  
57 which a long-read assembled genome has been recently reported (9). This analysis revealed a  
58 GEVE ~475 Kb long which is integrated within a single 592 Kb contig of *C. incerta*. (Figure 1B)

59

60 The GC-content of the *C. reinhardtii* GEVEs ranged from 58.27% (CC-2938) to 60.72% (CC-  
61 3268), close to the overall genomic GC content of *C. reinhardtii* (64%) (10). Similarly, the GC  
62 content of the *C. incerta* GEVE was 64.8%, resembling the overall GC content of the *C. incerta*  
63 genome (66%) (9) (Figure 1B). The GEVEs also contained numerous spliceosomal introns,  
64 ranging from 25 (CC-3061) to 72 (*C. incerta*) which has been previously found to be a feature of  
65 GEVEs present in other members of the Chlorophyta (4). Together, these results suggest the  
66 GEVEs were subjected to GC-content amelioration and intron-invasion since endogenization. In  
67 addition, the GEVE in *C. incerta* was flanked by highly repetitive regions on both ends (Figure  
68 2A). The repetitive region at the 5'-end harbors several reverse transcriptases and transposases  
69 (Dataset S1). These regions also have higher intron density compared to the GEVE region  
70 itself, and lower number of Giant Virus Orthologous Group (GVOG) hits consistent with their  
71 eukaryotic provenance (Figure 2A). This suggests that near-complete genomes of giant viruses  
72 can integrate within highly repetitive regions of eukaryotic genomes, potentially with the  
73 facilitation of transposable elements.

74

75 Using a newly established taxonomy of *Nucleocytoviricota* (11), we determined the phylogenetic  
76 position of the *C. reinhardtii* and *C. incerta* GEVEs and their relationships with other chlorophyte  
77 GEVEs that were recently reported (4) (Figure 1A). Five of the strains harbored GEVEs that  
78 formed a cluster within the *Imitervirales* order, consistent with their high average amino acid  
79 identity. The GEVE in *C. incerta* was the closest phylogenetic relative of the *Imitervirales* GEVEs  
80 in *C. reinhardtii*, indicating that closely-related giant viruses infect closely related  
81 *Chlamydomonas* species in nature. These GEVEs formed a sister clade with the GEVEs  
82 present in six other volvocine algae and belonged to the *Imitervirales* family 12 (Figure 1A).  
83 These results suggest that many viruses infecting volvocine algae in nature are closely related,  
84 and provides a phylogenetic framework for future efforts on detection and isolation of viruses  
85 infecting these algal lineages. In contrast to the GEVEs that could be classified as *Imitervirales*,  
86 the GEVE in CC-2938 strain belonged to the *Algavirales* (Figure 1A), demonstrating that *C.*  
87 *reinhardtii* is infected by multiple phylogenetically distinct lineages of giant viruses.

88

89 The GEVEs in *C. reinhardtii* encoded 99 (CC3061) to 254 (CC2937) genes, while the *C. incerta*  
90 GEVE encoded 355 genes. Most of the genes were shared among the *Imitervirales C.*  
91 *reinhardtii* GEVEs, consistent with their high average amino acid identity (AAI) to each other  
92 (Figure 1C, D). These GEVEs also shared a high number of orthogroups with the *C. incerta*  
93 GEVE. In contrast, only a few orthogroups were shared between the *Imitevirales* and the  
94 *Algavirales* GEVEs consistent with the large phylogenetic distance between these lineages.  
95 Between ~44-55% of the genes in the *C. reinhardtii* and *C. incerta* GEVEs have matches to  
96 Giant Virus Orthologous Groups (GVOGs), confirming their origin in the *Nucleocytoviricota*  
97 (Figure 1B). In addition, different genes in these regions have best matches to giant viruses,  
98 bacteria, and eukaryotes, which is a common feature of *Nucleocytoviricota* members given the  
99 diverse phylogenetic origin of the genes in these viruses (12) (Figure 2A). Based on the Cluster  
100 of Orthologous Group (COG) annotations, a high proportion of the GEVE genes are involved in  
101 transcription, and DNA replication and repair; however, genes encoding translation, nucleotide  
102 metabolism and transport, signal transduction, and posttranslational modification were also  
103 present, consistent with the diverse functional potential encoded by numerous  
104 *Nucleocytoviricota* (Figure 2B).

105  
106 A previous study has shown that several field strains of *C. reinhardtii* harbor many genes that  
107 are absent in the reference genome (7), which were possibly acquired from diverse sources. To  
108 quantify the amount of novel genetic material contributed by giant viruses to *C. reinhardtii*, we  
109 estimated the number of unique gene families in the analyzed *C. reinhardtii* field strains that are  
110 absent in the reference strain CC-503. On average ~2.24% of the genes in the field strains were  
111 unique compared to the reference strain (Figure 2C). Moreover, the GEVE-harboring field  
112 strains have significantly more unique genes compared to those without GEVEs, (Two-sided  
113 Man-Whitney U-test p-value <0.05). These results suggest that endogenization of giant viruses  
114 is an important component of inter-strain variability in *C. reinhardtii*. Recent studies have  
115 highlighted the importance of horizontal gene transfer (HGT) in structuring the pangenome of  
116 diverse eukaryotes (13, 14), and genes originating from endogenous *Nucleocytoviricota* were  
117 found to shape the genomes of many algal lineages, including members of the Chlorophyta (4,  
118 15). Compared to the GEVE-free strains, GEVE-containing strains harbored a significantly  
119 higher proportion of genes from several COG categories including Transcription, Signal  
120 Transduction, and Replication and Repair (Two sided Mann-Whitney U test p-value <0.05)  
121 (Figure 2C). All together, these GEVEs contributed many genes with known functions, including  
122 glycosyltransferases, proteins involved in DNA repair, oxidative stress, and heat shock  
123 regulation (Dataset S1).

## 124 125 **Discussion:**

126  
127 While much work remains to elucidate the role of GEVEs in shaping the ecological dynamics of  
128 *C. reinhardtii*, several possibilities remain open. Some of the genes contributed by the GEVEs  
129 can be potentially co-opted by the host, leading to changes in certain phenotypes compared to  
130 closely related strains without GEVEs. Strain-specific endogenization can also potentially lead  
131 to intraspecific variations in chromosome structure, partly mediated by the GEVE-encoded  
132 mobile elements (16). Finally, it is also possible that some of these GEVE-loci can produce

133 siRNAs that might participate in antiviral defense, and similar phenomena has been suggested  
134 for the virus-like loci in the genome of moss (*Physcomitrella patens*) (17). Recent studies on  
135 large-scale endogenization of giant virus genomes in diverse green algae and patchwork of viral  
136 genes in many algal lineages suggest that interactions between giant viruses and their algal  
137 hosts frequently shape the host genomes (4, 15), and therefore represents a major research  
138 frontier for studying the effect of giant viruses in influencing the (HGT) landscape. Our results  
139 indicate that endogenization of giant viruses can lead to large-scale genomic variability not only  
140 between algal species, but also between strains within the same population. Results reported in  
141 this study therefore represent an important advance in our understanding of how giant viruses  
142 shape the genome evolution of their hosts, while also expanding the scope of *C. reinhardtii* as a  
143 model organism to study the evolutionary fate and consequences of giant virus endogenization.

144

#### 145 **Methods:**

146

147 All methods and relevant citations are available in the 'Supplementary Information' file.

148

#### 149 **Data and Code availability:**

150

151 Dataset S1 contains information regarding the raw data source, GEVE functional annotations,  
152 hallmark gene distribution in each GEVE and coverage information of the partial GEVE in CC-  
153 3061. Dataset S2 contains figures related to the Method section - TNF dendrogram for the CC-  
154 2938 GEVE and promoter alignment plots between *C. reinhardtii* *Imitevirales* GEVEs and *C.*  
155 *incerta* GEVE.

156

157 All the GEVE fasta files, unique gene fasta in each of the strains and their annotations, and  
158 concatenated alignment file used to build the phylogenetic tree in Figure 1 are available in  
159 Zenodo: <https://zenodo.org/record/4958215>

160

161 Code and instructions for ViralRecall v2.0 and NCLDV marker search scripts are available at:  
162 [github.com/faylward](https://github.com/faylward).

163

#### 164 **Acknowledgement**

165

166 We acknowledge the use of the Virginia Tech Advanced Research Computing Center for  
167 bioinformatic analyses performed in this study. This work was supported by grants from the  
168 Institute for Critical Technology and Applied Science and the NSF (IIBR-1918271) and a Simons  
169 Early Career Award in Marine Microbial Ecology and Evolution to F.O.A.

170

#### 171 **Conflict of interest statement**

172

173 The authors declare no conflict of interest relevant to the content of the manuscript.

174

#### 175 **Figure legends:**

176

177 **Figure 1: General features and phylogeny of the GEVEs. A)** Maximum likelihood  
178 phylogenetic tree of the GEVEs and representative members from diverse NCLDV families  
179 constructed from a concatenated alignment of seven NCLDV hallmark genes (see Methods).  
180 Individual families within each order are indicated with abbreviations (IM - Imitevirales, AG -  
181 Algavirales) followed by family numbers, as specified in Aylward et al, 2019 (11). IDs of the  
182 GEVEs are indicated in bold-italic. **B)** Basic statistics of the GEVEs present in various field  
183 strains of *C. reinhardtii* and the GEVE present in the *C. incerta* genome. **C)** Heatmap  
184 representing the number of orthologous groups of proteins shared across all the GEVEs. **D)**  
185 Heatmap representing the average amino acid (AAI) % among the GEVEs.  
186 \* Length includes the eukaryotic regions flanking the *C. incerta* GEVE.

187  
188 **Figure 2: GEVE genomic and functional characteristics. A)** Circular plots of two  
189 representative GEVEs in *C. reinhardtii* and the GEVE present in *C. incerta*. For *C. reinhardtii*  
190 one representative *Imitevirales* GEVE (CC-2937) and the *Algavirales* GEVE (CC-2938) are  
191 shown. Circle plots show Giant Virus Orthologous Group (GVOG) hidden Markov model (HMM)  
192 hits, spliceosomal introns and the best LAST hit matches (see Supplementary Methods).  
193 Internal blue links delineate the duplicated regions. The eukaryotic regions flanking the *C.*  
194 *incerta* GEVE are delineated with light blue stripes. **B)** Functional potential encoded in the  
195 GEVEs as EggNOG categories. Proportion of genes in each category is normalized across all  
196 the NOG categories except category S (function unknown) and R (general function prediction).  
197 Raw functional annotations are present in Dataset S1. **C)** Unique genes in the field strains of *C.*  
198 *reinhardtii* compared to the reference strain CC-503. The heatmap represents % of unique  
199 genes that can be classified in different EggNOG categories (except category [R] - genel  
200 function prediction and [S] - function unknown). Categories marked with ‘\*\*\*’ are significantly  
201 overrepresented in the GEVE-containing strains compared to those without GEVEs. The bar  
202 plot on top of the heatmap represents % of unique genes in each strain. The names of the  
203 abbreviated categories are the same as in figure 2B. GEVE-containing strains have significantly  
204 higher percentages of unique genes compared to the strains without GEVEs.

## 205 206 **References:**

- 207 1. M. Moniruzzaman, C. A. Martinez-Gutierrez, A. R. Weinheimer, F. O. Aylward, Dynamic  
208 genome evolution and complex virocell metabolism of globally-distributed giant viruses.  
209 *Nat. Commun.* **11**, 1710 (2020).
- 210 2. H. Endo, *et al.*, Biogeography of marine giant viruses reveals their interplay with eukaryotes  
211 and ecological functions. *Nat Ecol Evol* **4**, 1639–1649 (2020).
- 212 3. E. V. Koonin, *et al.*, Global Organization and Proposed Megataxonomy of the Virus World.  
213 *Microbiol. Mol. Biol. Rev.* **84** (2020).
- 214 4. M. Moniruzzaman, A. R. Weinheimer, C. A. Martinez-Gutierrez, F. O. Aylward, Widespread  
215 endogenization of giant viruses shapes genomes of green algae. *Nature* (2020)  
216 <https://doi.org/10.1038/s41586-020-2924-2>.
- 217 5. S. Sasso, H. Stibor, M. Mittag, A. R. Grossman, From molecular manipulation of  
218 domesticated to survival in nature. *Elife* **7** (2018).



- 219 6. R. J. Craig, *et al.*, Patterns of population structure and complex haplotype sharing among  
220 field isolates of the green alga *Chlamydomonas reinhardtii*. *Mol. Ecol.* **28**, 3977–3993  
221 (2019).
- 222 7. J. M. Flowers, *et al.*, Whole-Genome Resequencing Reveals Extensive Natural Variation in  
223 the Model Green Alga *Chlamydomonas reinhardtii*. *Plant Cell* **27**, 2353–2369 (2015).
- 224 8. A. R. Hasan, J. K. Duggal, R. W. Ness, Consequences of recombination for the evolution of  
225 the mating type locus in *Chlamydomonas reinhardtii*. *New Phytol.* **224**, 1339–1348 (2019).
- 226 9. R. J. Craig, A. R. Hasan, R. W. Ness, P. D. Keightley, Comparative genomics of  
227 *Chlamydomonas*. *Plant Cell* (2021) <https://doi.org/10.1093/plcell/koab026>.
- 228 10. S. S. Merchant, *et al.*, The *Chlamydomonas* genome reveals the evolution of key animal  
229 and plant functions. *Science* **318**, 245–250 (2007).
- 230 11. F. O. Aylward, M. Moniruzzaman, A. D. Ha, E. V. Koonin, A Phylogenomic Framework for  
231 Charting the Diversity and Evolution of Giant Viruses. *PloS Biol.* 19(10):e3001430.
- 232 12. J. Filée, N. Pouget, M. Chandler, Phylogenetic evidence for extensive lateral acquisition of  
233 cellular genes by Nucleocytoplasmic large DNA viruses. *BMC Evol. Biol.* **8**, 320 (2008).
- 234 13. X. Fan, *et al.*, Phytoplankton pangenome reveals extensive prokaryotic horizontal gene  
235 transfer of diverse functions. *Sci Adv* **6**, eaba01111 (2020).
- 236 14. S. J. Sibbald, L. Eme, J. M. Archibald, A. J. Roger, Lateral Gene Transfer Mechanisms and  
237 Pan-genomes in Eukaryotes. *Trends Parasitol.* **36**, 927–941 (2020).
- 238 15. D. R. Nelson, *et al.*, Large-scale genome sequencing reveals the driving forces of viruses in  
239 microalgal evolution. *Cell Host Microbe* **29**, 250–266.e8 (2021).
- 240 16. J. Filée, Giant viruses and their mobile genetic elements: the molecular symbiosis  
241 hypothesis. *Curr. Opin. Virol.* **33**, 81–88 (2018).
- 242 17. D. Lang, *et al.*, The *Physcomitrella patens* chromosome-scale assembly reveals moss  
243 genome structure and evolution. *Plant J.* **93**, 515–533 (2018).

244

245

246

247

248

249

250

251

252

253

254

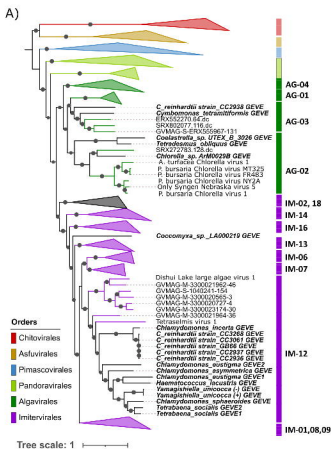

**B)**

| Strain ID         | GEVE Length (Kbp) | Contig Count | Protein count | Intron count | GCC%  | % of GVGO hits |
|-------------------|-------------------|--------------|---------------|--------------|-------|----------------|
| CC-3061           | 112.7             | 8            | 99            | 25           | 60.51 | 56             |
| CC-2938           | 315.2             | 11           | 214           | 47           | 58.27 | 44             |
| GB-66             | 325.7             | 23           | 252           | 60           | 59.24 | 50             |
| CC-3268           | 333.8             | 8            | 242           | 52           | 60.72 | 51             |
| CC-2936           | 335.5             | 11           | 245           | 55           | 60.32 | 52             |
| CC-2937           | 356.0             | 18           | 254           | 57           | 60.51 | 50             |
| <i>C. incerta</i> | 592.1*            | 1            | 355           | 72           | 64.78 | 48             |

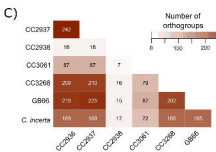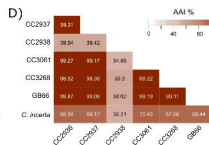



A)

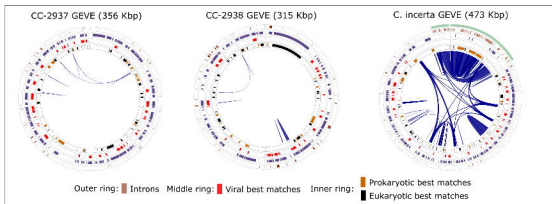

B)

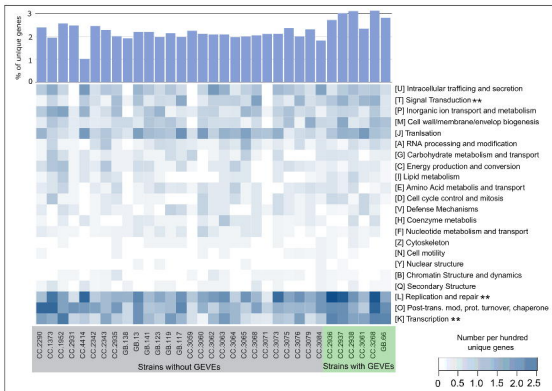

Source: https://www.biorxiv.org/content/10.1101/2021.11.30.470594v1.full.pdf
